# Supplementary material for: Adhesion of Oral Bacteria to Commercial d-PTFE Membranes: Polymer Microstructure Makes a Difference
Source: Int J Mol Sci. 2022 Mar 10;23(6):2983. doi: 10.3390/ijms23062983 (PMC8949314; doi:10.3390/ijms23062983)
Supplement: Supplementary file 1 [file ijms-23-02983-s001.zip › ijms-1622587-supplementary.pdf]

# Adhesion of Oral Bacteria to Commercial d-PTFE Membranes: Polymer Microstructure Makes a Difference

Gabrijela Begić <sup>1,†</sup>, Mirna Petković Didović <sup>2,†</sup>, Sanja Lučić Blagojević <sup>3</sup>, Ivana Jelovica Badovinac <sup>4,5</sup>, Jure Žigon <sup>6</sup>, Marko Perčić <sup>5</sup>, Olga Cvijanović Pelozo <sup>7,\*</sup> and Ivana Gobin <sup>1</sup>

<sup>1</sup> Department of Microbiology and Parasitology, Faculty of Medicine, University of Rijeka, 51000 Rijeka, Croatia; gabrijela.begic@uniri.hr (G.B.); ivana.gobin@uniri.hr (I.G.)

<sup>2</sup> Department of Medical Chemistry, Biochemistry and Clinical Chemistry, Faculty of Medicine, University of Rijeka, 51000 Rijeka, Croatia; mirnapd@medri.uniri.hr

<sup>3</sup> Department of Surface Engineering of Polymer Materials, Faculty of Chemical Engineering and Technology, University of Zagreb, 10000 Zagreb, Croatia; slucic@fkit.hr

<sup>4</sup> Department of Physics, University of Rijeka, 51000 Rijeka, Croatia; ijelov@phy.uniri.hr

<sup>5</sup> Centre for Micro- and Nanosciences and Technologies & Center for Artificial Intelligence and Cyber security, University of Rijeka, 51000 Rijeka, Croatia; marko.percic@riteh.uniri.hr

<sup>6</sup> Department of Wood Science and Technology, Biotechnical Faculty, University of Ljubljana, 1000 Ljubljana, Slovenia; Jure.zigon@bf.uni-lj.s

<sup>7</sup> Department of Anatomy, Faculty of Medicine, University of Rijeka, 51000 Rijeka, Croatia

\* Correspondence: olga.cvijanovic@uniri.hr

† The authors contributed equally to this work.

**Table S1.** Total surface free energies ( $\gamma^{\text{tot}}$ ) and surface free energy components (dispersive  $\gamma^{\text{d}}$ ; polar  $\gamma^{\text{p}}$ ; Lifshitz-van der Waals  $\gamma^{\text{LW}}$ ; electron pair acceptor, i.e., acidic  $\gamma^+$ ; electron pair donor, i.e., basic  $\gamma^-$ ) of the PTFE membranes calculated using the Owens-Wendt, Wu, and acid-base model. All values are given in mJ/m<sup>2</sup>.

|                      | Owens-Wendt         |                     |                       | Wu                  |                     |                       | acid-base            |            |            |                       |
|----------------------|---------------------|---------------------|-----------------------|---------------------|---------------------|-----------------------|----------------------|------------|------------|-----------------------|
|                      | $\gamma^{\text{d}}$ | $\gamma^{\text{p}}$ | $\gamma^{\text{tot}}$ | $\gamma^{\text{d}}$ | $\gamma^{\text{p}}$ | $\gamma^{\text{tot}}$ | $\gamma^{\text{LW}}$ | $\gamma^+$ | $\gamma^-$ | $\gamma^{\text{tot}}$ |
| <b>PTFE-W side 1</b> | 10.69               | 0.01                | 10.7                  | 15.01               | 0                   | 15.01                 | 10.33                | 0          | 0          | 10.33                 |
| <b>PTFE-W side 2</b> | 10.08               | 0.05                | 10.13                 | 14.49               | 0                   | 14.49                 | 9.7                  | 0          | 0.33       | 9.7                   |
| <b>PTFE-B side 1</b> | 8.5                 | 0                   | 8.5                   | 13.49               | 0                   | 13.49                 | 8.49                 | 0          | 0          | 8.49                  |
| <b>PTFE-B side 2</b> | 11.95               | 0                   | 11.95                 | 17.4                | 0                   | 17.4                  | 13.41                | 0          | 0.52       | 13.41                 |
